# Supplementary material
Source: PubMed Central journal article supplement (PMC5820138)
Supplement: NIHMS931851-supplement-1.pdf [file NIHMS931851-supplement-1.pdf]

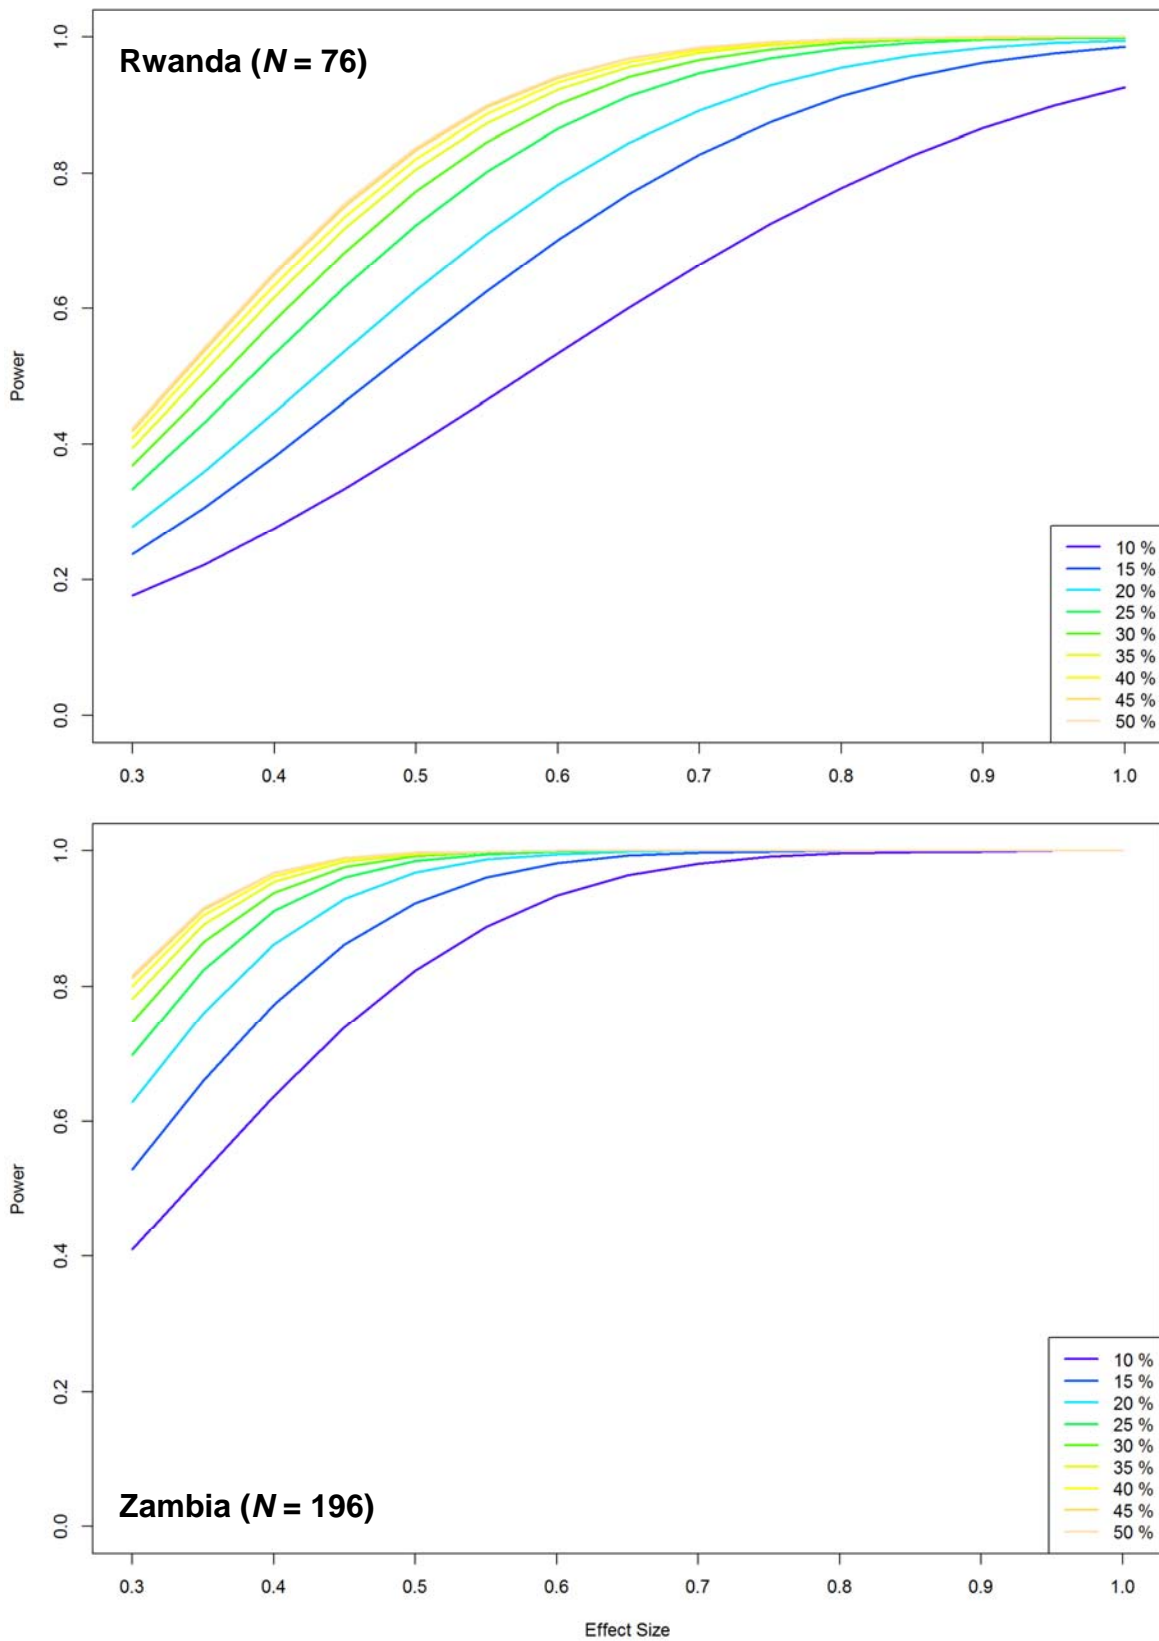

**Figure S1. Statistical power in confirming previously reported HLA-I AAR variants associated with HIV-1 viral load ( $\alpha = 0.05$ ).** In the Rwandan and Zambian cohorts ( $N = 76$  and  $196$ , respectively), statistical power (the Y-axis) varies by estimated effect sizes (regression beta, from 0.3-1.0  $\log_{10}$  viral load) and frequencies of AAR variants (from 10% to 50%).

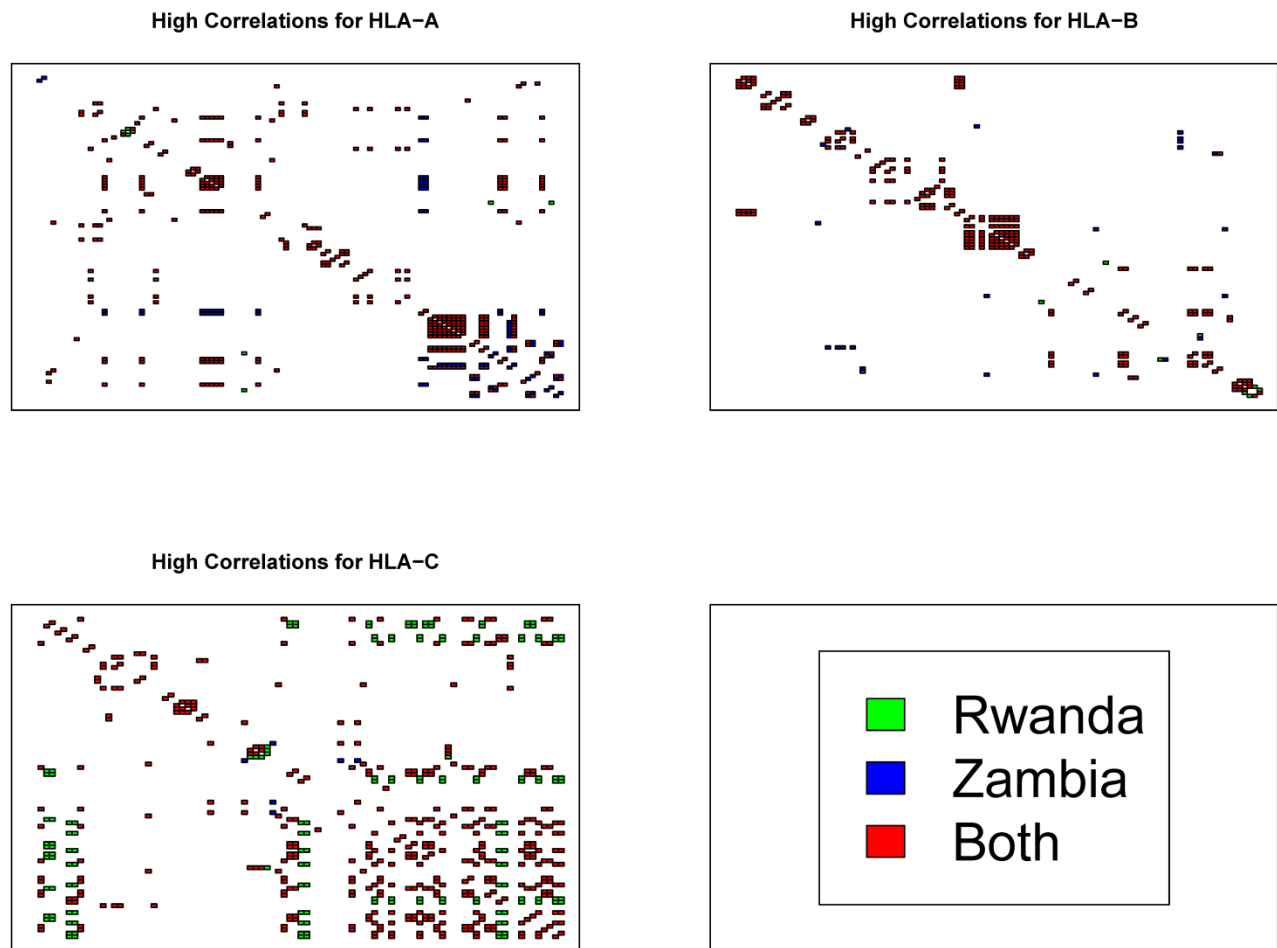

**Figure S2.** A graphical view of HLA-I AAR variants that are in strong linkage disequilibrium ( $r^2 > 0.80$ ) in either cohort (**green = Rwanda only**; **blue = Zambia only**) or both cohorts (**red**). Several AAR variants in exclusive LD are highlighted in **Table S1**.
